# Supplementary material
Source: PubMed Central journal article supplement (PMC10394118)

# Supplemental Figure: Flow Gating Strategy

## CAR Detection

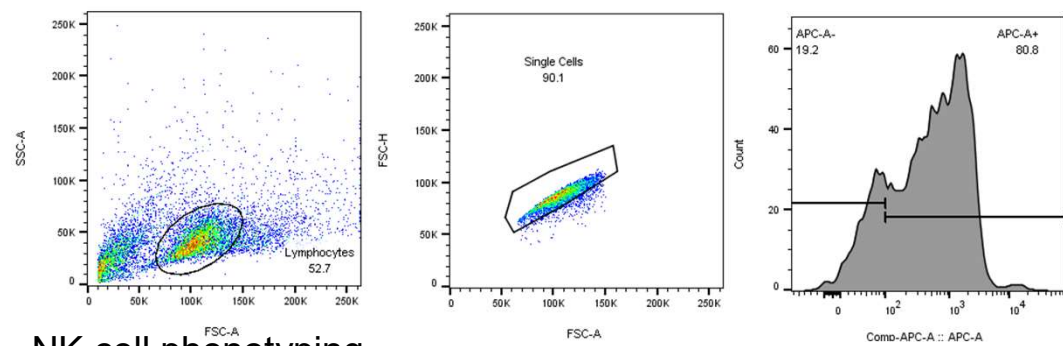

## NK cell phenotyping

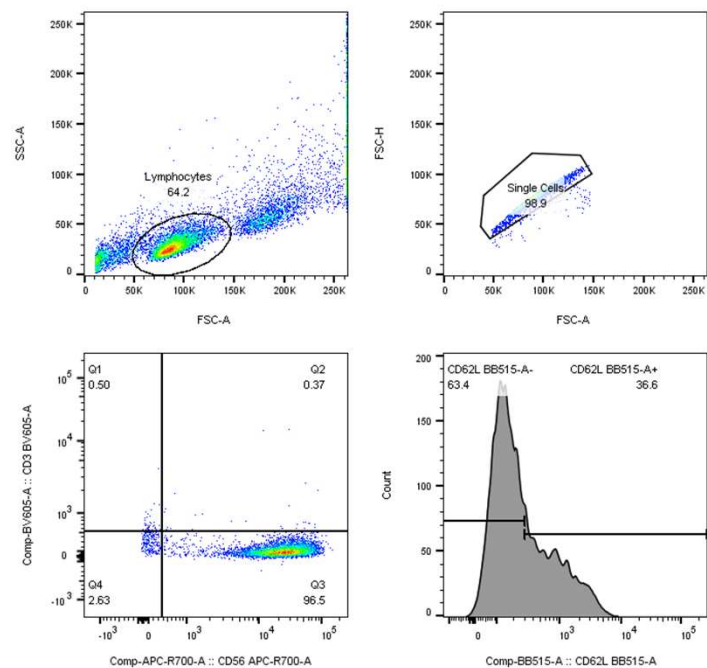

## T cell phenotyping

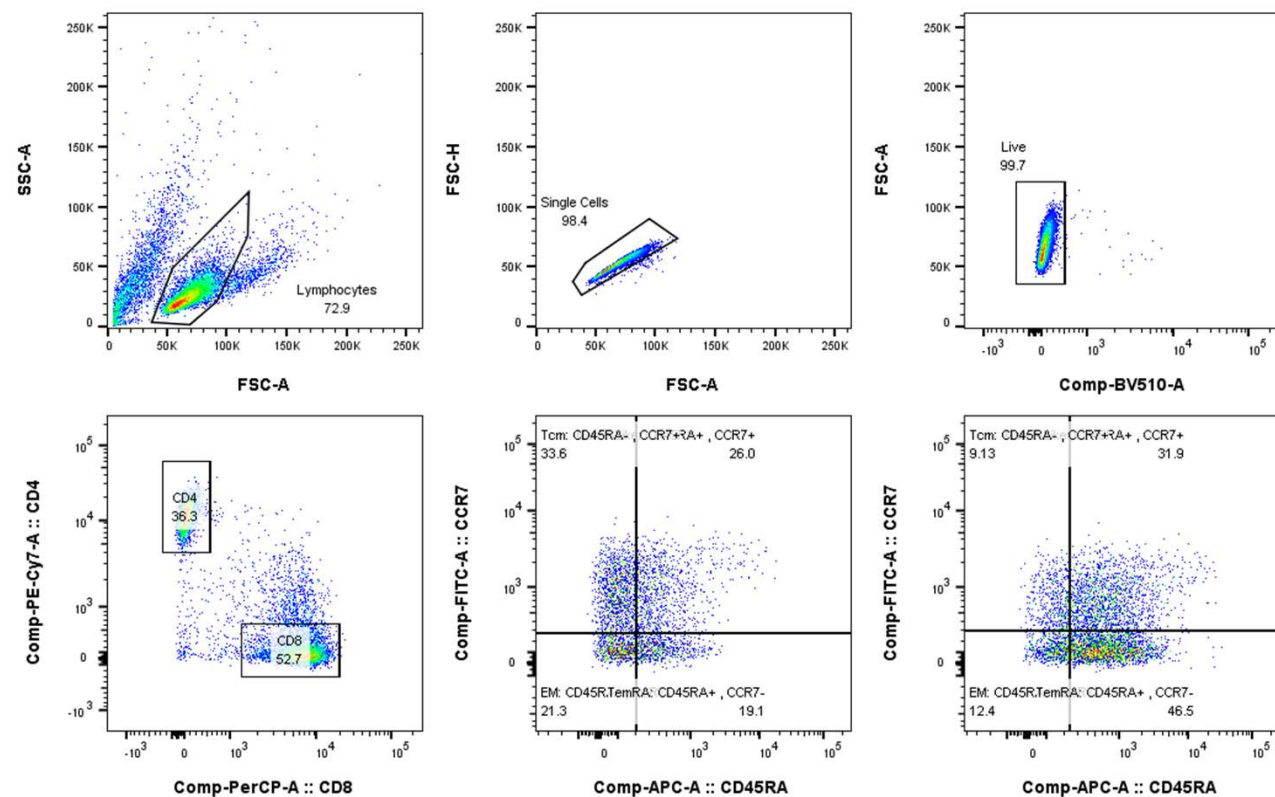

Supplement: NIHMS1894307-supplement-Supp_Fig_1.pdf [file NIHMS1894307-supplement-Supp_Fig_1.pdf]
