# Supplementary material
Source: PubMed Central journal article supplement (PMC10394118)
Supplement: NIHMS1894307-supplement-Supp_Table_1.pdf [file NIHMS1894307-supplement-Supp_Table_1.pdf]

**Antibodies utilized**

| <b>SPECIFICITY</b> | <b>CLONE</b> | <b>FLUOROCHROME</b> | <b>Company</b>  | <b>CAT#</b> |
|--------------------|--------------|---------------------|-----------------|-------------|
| CD3                | OKT3         | Superbright 600     | Thermofisher    | 63-0037-42  |
| CD56               | NCAM16.2     | PE-TX red           | BD Biosciences  | 564849      |
| CD62L              | DREG-56      | BB515               | BD Biosciences  | 464742      |
| NKG2D              | ID11         | PerCPeFluor710      | Thermofisher    | 46-5878-42  |
| CD57               | NK-1         | PE                  | BD Biosciences  | 560844      |
| CD16               | REA423       | APC-H7              | BD Biosciences  | 560715      |
| NKG2C              | REA205       | PE Vio 770          | Miltenyi Biotec | 130-119-776 |
| CD8                | SK1          | PerCP               | Biolegend       | 344708      |
| CD45RA             | HI100        | APC                 | Biolegend       | 304112      |
| CD197(CCR7)        | G043H7       | FITC                | Biolegend       | 353216      |
| CD4                | SK3          | PE/Cy7              | Biolegend       | 344612      |
| CD276              | 7-517        | BV421               | BD Biosciences  | 565829      |
